# Supplementary material
Source: publisher figshare collection journal article supplement (https://karger.figshare.com/ndownloader/files/27686667)
Supplement: Supplementary file 1 [file 27686667]

**Supplementary table S3. The log2 transformed expression levels of hub genes and values of eGFR in GSE30528**

| **Gene symbol** | **Contol**  **01** | **Contol**  **02** | **Contol**  **03** | **Contol**  **04** | **Contol**  **05** | **Contol**  **06** | **Contol**  **07** | **Contol**  **08** | **Contol**  **09** | **Contol**  **10** | **Contol**  **11** | **Contol**  **12** | **Contol**  **13** |
| --- | --- | --- | --- | --- | --- | --- | --- | --- | --- | --- | --- | --- | --- |
| LUM | 7.87306 | 9.44935 | 7.73834 | 4.99015 | 7.76269 | 7.96323 | 8.03248 | 8.03036 | 8.84584 | 8.10825 | 7.64938 | 6.95887 | 7.21978 |
| ELN | 6.06979 | 6.29396 | 6.43793 | 6.29197 | 6.47873 | 6.52752 | 6.29197 | 5.60559 | 5.95078 | 6.07978 | 6.13499 | 6.353 | 6.2396 |
| FMOD | 6.14982 | 6.593 | 6.14739 | 6.60317 | 6.23062 | 6.44751 | 6.46843 | 5.85714 | 6.26586 | 6.0594 | 5.98101 | 6.03337 | 6.44014 |
| eGFR (ml/min/1.73m2) | 104 | 116 | 109 | 104 | 100 | 56 | 52 | 68.8831 | 91 | 61 | 69 | 55 | 66 |

| **Gene**  **symbol** | **DN01** | **DN02** | **DN03** | **DN04** | **DN05** | **DN06** | **DN07** | **DN08** | **DN09** |
| --- | --- | --- | --- | --- | --- | --- | --- | --- | --- |
| LUM | 10.7739 | 7.0483 | 11.0066 | 10.2045 | 10.3496 | 9.17661 | 11.303 | 11.0866 | 10.0887 |
| ELN | 6.3009 | 6.40053 | 7.22703 | 6.88114 | 6.48305 | 6.31325 | 5.93089 | 5.88081 | 6.21522 |
| FMOD | 7.48186 | 6.85136 | 7.3778 | 6.93555 | 7.09955 | 6.63586 | 7.27636 | 6.56962 | 6.71333 |
| eGFR (ml/min/1.73m2) | 26 | 58 | 24 | 40.7832 | 23 | 36 | 16 | 37.9513 | 18 |

DN: Diabetic nephropathy; control: Healthy living donors; eGFR: evaluated glomerular filtration rate.
